# Supplementary material for: Green emission of indium oxide via hydrogen treatment
Source: Royal Society of Chemistry journal article supplement (doi:10.1039/c8ra00654g), 2018-01-01
Supplement: c8ra00654g1.pdf [file c8ra00654g1.pdf]

## Electronic Supplementary Information (ESI)

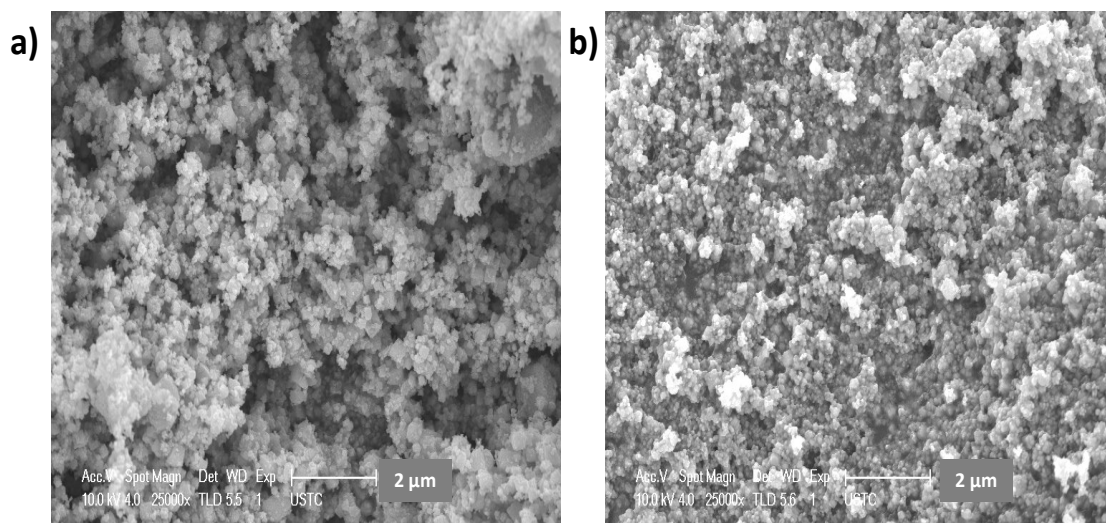

**Fig. S1** SEM images of a) air-In<sub>2</sub>O<sub>3</sub> and b) H<sub>2</sub>-In<sub>2</sub>O<sub>3</sub>.

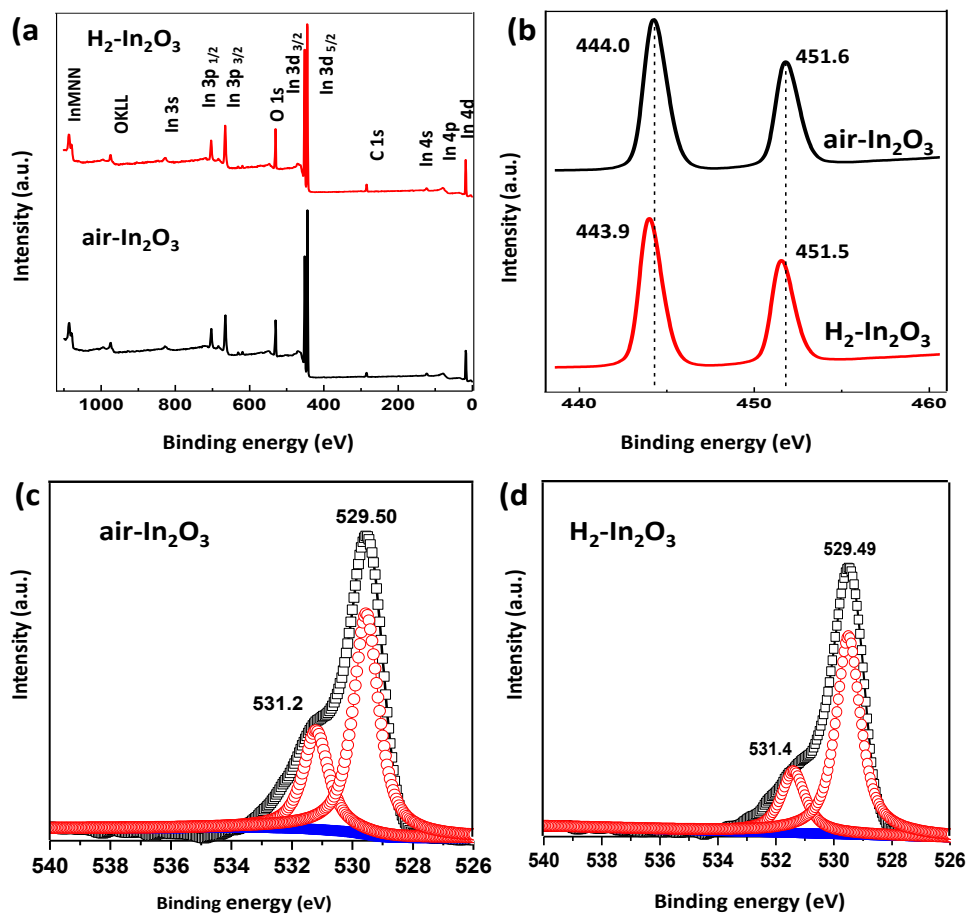

**Fig. S2** Survey XPS spectra of air-In<sub>2</sub>O<sub>3</sub> and H<sub>2</sub>-In<sub>2</sub>O<sub>3</sub> (a). In 3d core level XPS spectra of air-In<sub>2</sub>O<sub>3</sub> and H<sub>2</sub>-In<sub>2</sub>O<sub>3</sub> (b). XPS spectra of O 1s peak of air-In<sub>2</sub>O<sub>3</sub> (c) and H<sub>2</sub>-In<sub>2</sub>O<sub>3</sub> (d). Black lines are the experimental XPS data, which are further fitted into two peaks (shown by red lines).

The XPS has been employed to detect the chemical states of air- and H<sub>2</sub>-In<sub>2</sub>O<sub>3</sub> samples. Only O, In and C (used as reference) signals appear in XPS survey acquired from air- and H<sub>2</sub>-In<sub>2</sub>O<sub>3</sub> (Fig. S2 a). As shown in Fig. S2 b In 3d peaks of H<sub>2</sub>-In<sub>2</sub>O<sub>3</sub> are very closed to the In 3d peaks of air-In<sub>2</sub>O<sub>3</sub>. However, after hydrogen treatment In 3d peaks at lower binding energy could be mainly ascribed to oxygen vacancies.<sup>1,2</sup> Fig. S2 c and d presents the XPS spectrum for O 1s air- and H<sub>2</sub>-In<sub>2</sub>O<sub>3</sub> respectively and each O 1s curve can be fitted into two peaks. In both samples, highest binding energy peak located at 529 eV is corresponded to indium oxygen bond (In-O). In air-In<sub>2</sub>O<sub>3</sub> the peak at 531.2 eV can be attributed to the O<sup>2-</sup> ions in the oxygen deficient region or to the surface adsorbed oxygen.<sup>3</sup> Whereas, in H<sub>2</sub>-In<sub>2</sub>O<sub>3</sub> the peak centered at 531.4 eV can be assigned to the oxygen defects.<sup>4</sup> Furthermore, In 3d and O 1s regions evidenced no significant differences in the particle surface of air- and H<sub>2</sub>-In<sub>2</sub>O<sub>3</sub>. This could be the reason that the green emission intensity is lower than blue emission.

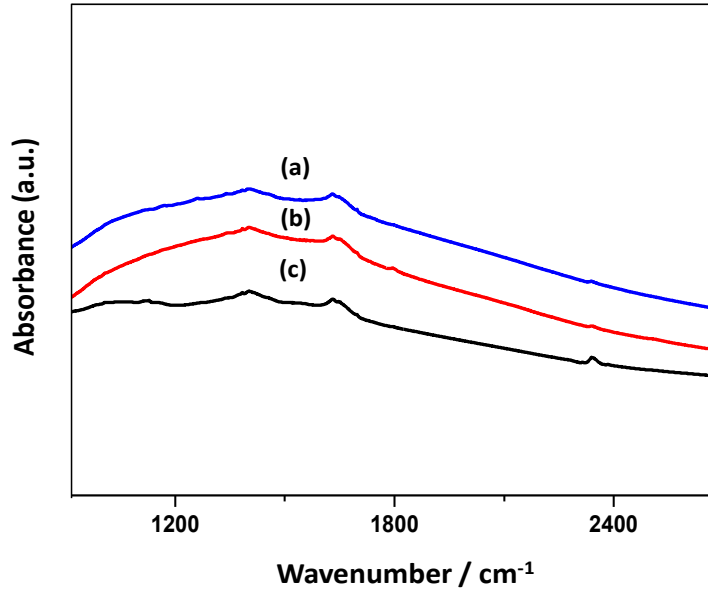

**Fig. S3** (a) FT-IR spectra of  $\text{H}_2\text{-In}_2\text{O}_3$  at 400 °C for 12 h and (b and c) after oxidative treatment at 200 °C for 6 h and 400 °C for 12 h, respectively. After oxidative treatment (from top to bottom b and c), there is a continuous decrease in IR absorption signals.

FT-IR spectroscopy is a useful technique to monitor the CB and shallow state electrons in n-type semiconductors. According to Drude theory the resonance frequency of electrons depends upon the number of free electrons ( $e^-$ )  $N$ . The absorbance at a particular wavelength ( $\lambda$ ) is proportional to number of electron ( $N$ ) in conduction band.

$$A(\lambda) \sim N \quad \text{eq (1)}$$

The increased absorption in IR spectra (Fig. 3S a) can directly attributed to the CB and shallow state electrons in  $\text{H}_2\text{-In}_2\text{O}_3$ , as a result of reducing atmosphere. In order to test this hypothesis the respective sample ( $\text{H}_2\text{-In}_2\text{O}_3$ ) was oxidized at 200 °C for 6 h and 400 °C for 12 h (Fig. 3S b and c). The intensity of broad absorption in IR spectra decreased upon oxygen adsorption. The electrons in CB and shallow state combine with hole and cause recombination process. However adsorbed  $\text{O}_2$  can act as an electron sink and prevent such recombination process.<sup>5</sup> The adsorbed  $\text{O}_2$  clearly affect or decrease the CB electrons and represent inactive IR species. Thus, the broad absorbance is quenched upon introduction of oxygen, which acts as an excellent electron ( $e^-$ ) scavenger.

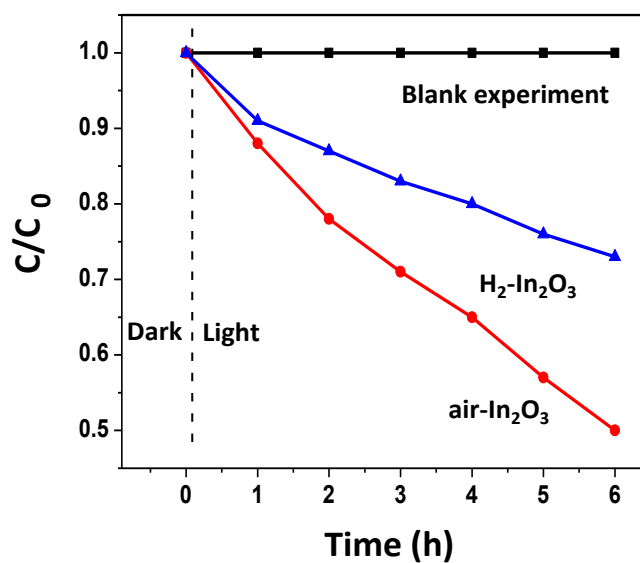

**Fig. S4** Methyl orange degradation under irradiation  $> 400$  nm with an optical power density  $150 \text{ mW cm}^{-2}$  using  $\text{H}_2\text{O}_2$  as an oxidant. For blank experiment all parameters are same except sample addition.

## References

- 1 R. X. Wang, C. D. Beling, S. Fung, A. B. Djurišić, C. C. Ling and S. Li, *J. Appl. Phys.*, 2005, **97**, 033504.
- 2 D. Wei, L. Yao, S. Yang, Z. Cui, B. Wei, M. Cao and C. Hu, *ACS Appl. Mater. Interfaces*, 2015, **7**, 20761-20768.
- 3 R. R. Krishnan, S. R. Chalana, S. Suresh, S. K. Sudheer, C. Sudarsanakumar, M. C. S. Kumar, and V. P. M. Pillai, *Phys. Status Solidi C*, 2017, **14**, 2–15.
- 4 S. -H. Kim, H. -S. Choi and K. -D. Jung, *Cryst. Growth Des.*, 2016, **16**, 1387-1394.
- 5 A. L. Linsebigler, G. Lu and J. T. Yates, *Chem. Rev.*, 1995, **95**, 735-758.
